# Supplementary material for: Toll and IMD Immune Pathways Are Important Antifungal Defense Components in a Pupal Parasitoid, Pteromalus puparum
Source: MDPI journal article supplement (doi:10.3390/ijms241814088), 2023-09-14
Supplement: s1 [file s1]

## Supplemental Tables and figures

(A) *dsLuc*-treated *P. puparum* exposed to different concentration of *B. bassiana*

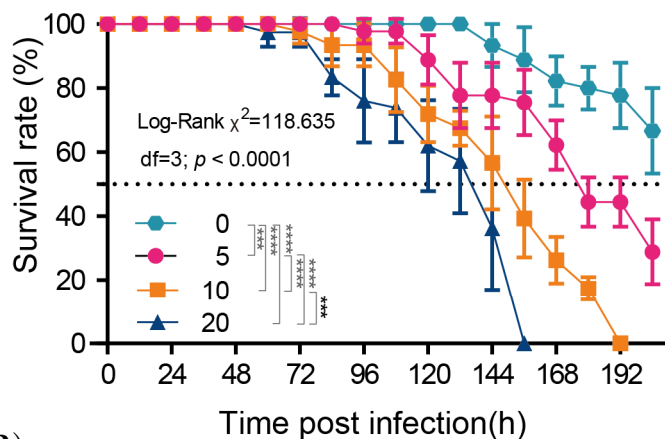

(B)

| CONC<br>(Conidia/mm <sup>2</sup> ) | Total<br>number | Percent<br>survival (%) | Std.<br>Deviation | LT50 (h) | Std.<br>Error |
|------------------------------------|-----------------|-------------------------|-------------------|----------|---------------|
| 0                                  | 45              | 66.67                   | 13.33             | /        | /             |
| 5                                  | 45              | 28.89                   | 10.18             | 180.00   | 5.00          |
| 10                                 | 46              | 0.00                    | 0.00              | 156.00   | 4.97          |
| 20                                 | 43              | 0.00                    | 0.00              | 144.00   | 4.23          |

Figure S1. Virulence of *B. bassiana* to *dsLuc* injected *P. puparum*. The number of dead parasitoids was counted every 12 hours. (A) Survival rate of *dsLuc* treated *P. puparum* in response to different dose (conidia/mm<sup>2</sup>) of *B. bassiana* at different time points. Log-rank test was used to assess different in survival between treatments. Significant differences were represented by definite  $p$  value and asterisk (\*\*\*)  $p < 0.001$ ; \*\*\*\*  $p < 0.0001$ ). (B) Median lethal time (LT50) and percent survival rate of fungal-treated parasitoids.

Table S1. The FPKM values of Toll-like genes in the adult stage of *P. puparum*.

|                 | gene_id     | PpAd_1   | PpAd_2   | PpAd_3   | PpAd_4   |
|-----------------|-------------|----------|----------|----------|----------|
| <i>PpTollA</i>  | PPU12940-RA | 49.41966 | 47.3735  | 42.18424 | 59.04608 |
| <i>PpTollB</i>  | PPU09907-RA | 46.43197 | 47.72764 | 36.52581 | 48.866   |
| <i>PpTollC</i>  | PPU09921-RA | 5.623631 | 5.151635 | 6.790215 | 5.26776  |
| <i>PpToll6</i>  | PPU03159-RA | 2.601372 | 2.317239 | 5.017081 | 1.559985 |
| <i>PpToll7</i>  | PPU03999-RA | 14.01884 | 13.39101 | 11.87163 | 11.97818 |
| <i>PpToll10</i> | PPU00761-RA | 0.135699 | 0        | 0.135703 | 0        |

Table S2. Primers used for qPCR and dsRNA synthesis

| Gene Name      | Gene ID     |     | Sequence (5'-3')     | Size(bp) |
|----------------|-------------|-----|----------------------|----------|
| <i>PpTollA</i> | PPU12940-RA | -F- | CGACATGAACCACAATCGAC | 131      |
|                |             | -R- | TCGCCATCGATATACGTCAA |          |
| <i>PpTollB</i> | PPU09907-RA | -F- | CGCGAGATCTTTTGAGAGGC | 135      |

|                       |             |     |                                            |     |
|-----------------------|-------------|-----|--------------------------------------------|-----|
|                       |             | -R- | TGAGGTTGTTGTTGCTGAGC                       |     |
| <i>PpTollC</i>        | PPU09921-RA | -F- | AACCTCAAGACGCTGCTACT                       | 166 |
|                       |             | -R- | AGTTGGACTGGACGAAGGAG                       |     |
| <i>PpToll6</i>        | PPU03159-RA | -F- | CAGCCAGATCGTCTCCATCC                       | 146 |
|                       |             | -R- | GTTCTGGCAGGTAGAGCTCC                       |     |
| <i>PpToll7</i>        | PPU03999-RA | -F- | CTGATCGTCTCGACCTCTC                        | 112 |
|                       |             | -R- | TGTGGCTGATCGAGTTGTTT                       |     |
| <i>PpToll10</i>       | PPU00761-RA | -F- | GTCTTCCTGGCCAACGAGT                        | 177 |
|                       |             | -R- | CAGACGATGACGGTGCAG                         |     |
| <i>PpIMD</i>          | PPU01186-RA | -F- | AAAGGTGGCACTGGTGAAGT                       | 126 |
|                       |             | -R- | TTCGACGCATTATATCCA                         |     |
| <i>PpMyD88</i>        | PPU08578-RA | -F- | AGGTTTCAGGACCTCCGAGT                       | 149 |
|                       |             | -R- | TTTTCTGATGCTGTTGCAC                        |     |
| <i>PpPelle</i>        | PPU10296-RA | -F- | GCTGCAACAGACAACCTGGAA                      | 127 |
|                       |             | -R- | CACAATCAGAACCCTTGGT                        |     |
| <i>PpTraf</i>         | PPU05667-RA | -F- | TTCTCCCTGGACAAGCACAT                       | 122 |
|                       |             | -R- | AGCGACATCTTGTTTCATGGC                      |     |
| <i>PpDredd</i>        | PPU06095-RA | -F- | AGCCATGGGTCAGAAGGTG                        | 177 |
|                       |             | -R- | TCCTGTGCTTTGTTCTGGAC                       |     |
| <i>PpTab2</i>         | PPU15978-RA | -F- | CGTCTATCAGTGCATTGCCC                       | 168 |
|                       |             | -R- | ATCTCGCGCAAATTCACGG                        |     |
| <i>PpRelish</i>       | PPU06179-RA | -F- | AAAGACTTCGCCGACTACGA                       | 147 |
|                       |             | -R- | GATCCGTGATTTCGTGTGTTG                      |     |
| <i>PpPteromalusin</i> | PPU05423-RA | -F- | ACTTCGTTTTCTGCTCGTC                        | 101 |
|                       |             | -R- | TCCCTTCATGATGCAGTCGA                       |     |
| <i>PpDefensin</i>     | PPU12673-RA | -F- | CAGCGCAGAGTAACCTGTGA                       | 168 |
|                       |             | -R- | TTATCCAAAGCGCTTGTTC                        |     |
| <i>PpAbaecin</i>      | PPU09187-RA | -F- | TTGCTCGCTGTAGCCCTTAT                       | 123 |
|                       |             | -R- | TCTGCCACTCCAAGTTCCTT                       |     |
| <i>Pp18s rRNA</i>     |             | -F- | CGAGCGATGAACCGACAG                         |     |
|                       |             | -R- | CGGGGAGGTAGTGACGAA                         |     |
| <i>Bb18s rRNA</i>     |             | -F- | AGATACCGTCGTAGTCTTAACCATAAACT              |     |
|                       |             | -R- | TTCAGCCTTGCGACCATACT                       |     |
| <i>dsPpTollA</i>      | PPU12940-RA | -F- | TAATACGACTCACTATAGGGAGGAAATCAAGGTTTGGCTGTA | 429 |
|                       |             | -R- | TAATACGACTCACTATAGGGTCATGCTGAGGTAAGCTTTCAA |     |
| <i>dsPpIMD</i>        | PPU01186-RA | -F- | TAATACGACTCACTATAGGGCTCCACGATCGGAAAATAGC   | 523 |
|                       |             | -R- | TAATACGACTCACTATAGGGGTGCCACCTTTGTGCTTGTA   |     |
| <i>dsLuc</i>          |             | -F- | TAATACGACTCACTATAGGGTGGAATGTTTACTACACTCG   |     |
|                       |             | -R- | TAATACGACTCACTATAGGGCATAATCATAGGACCTCTCA   |     |
